# Supplementary material
Source: Springer Nature journal article supplement (https://www.springermedizin.de/resource/supplementary/13045_2012_284_MOESM2_ESM.pdf/9661040)

(%)

DFS

----- MRD - after induction

— MRD + after induction & MRD - after consolidation

3Y DFS

MRD - after induction 69%

MRD - after consolidation 29%

$p=0.004$

N (at risk) upper : MRD - after induction, Lower : P1 MRD - after consolidation

26

25

21

16

11

8

7

4

3

2

1

1

Years

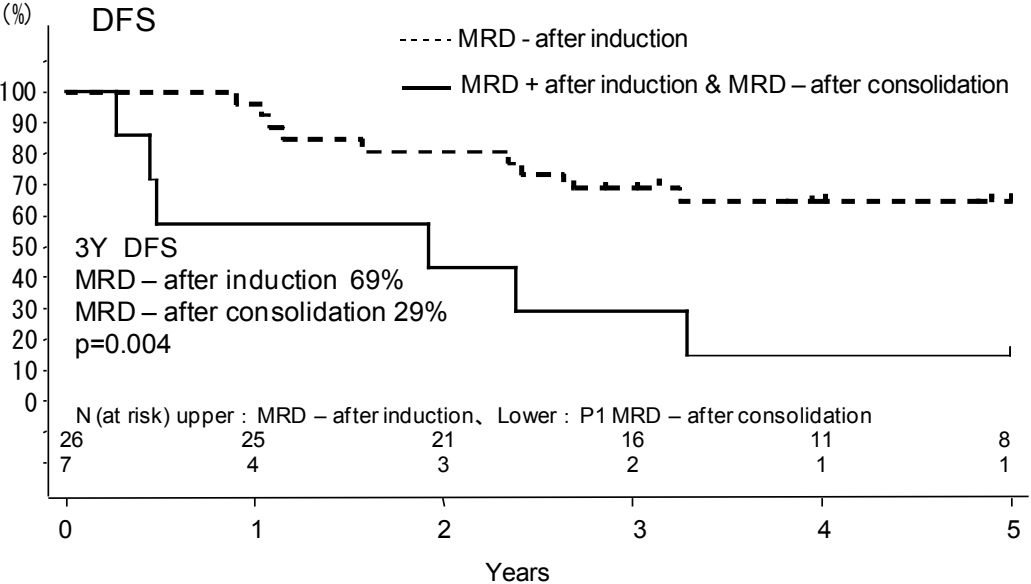

Supplement: MOESM2 [file 9661040]
